# Supplementary material for: Enhancement of Non-photochemical Quenching as an Adaptive Strategy under Phosphorus Deprivation in the Dinoflagellate Karlodinium veneficum
Source: Front Microbiol. 2017 Mar 15;8:404. doi: 10.3389/fmicb.2017.00404 (PMC5350143; doi:10.3389/fmicb.2017.00404)
Supplement: Supplementary file 2 [file Table_2.xlsx]

## Sheet: Karve_L1-VS-Karve_L1-P.Down_ann
Table S2 Up-regulated proteins under -P condition compared to +P condition based on iTRAQ analysis.
Hits	cDNA library Accession	-P/+P Ratio	Description	Annatation source	Database Accession	Identity	E-Value	COG Functional-Categories
1	KvenUN10757_1_726_plus	1.248	Ribosomal protein L16/L10E	COG	COG0197	216	3e-56	Translation, ribosomal structure and biogenesis
2	KvenUN23717_1_423_minus	1.283	Ribosomal protein S13	COG	COG0099	167	7e-42	Translation, ribosomal structure and biogenesis
3	KvenUN01642_71_966_plus	1.469	FOG: PAS/PAC domain (PHOT2)	COG	COG2202	61.6	1e-09	Signal transduction mechanisms
4	KvenUN08440_1_808_plus	1.561	14-3-3 family protein	COG	COG5040	169	4e-42	Signal transduction mechanisms
5	KvenUN11447_1_1497_minus	1.386	SAM-dependent methyltransferases	COG	COG0500	63.2	9e-10	Secondary metabolites biosynthesis, transport and catabolism ; General function prediction only
6	KvenUN09218_1_1371_plus	1.305	Single-stranded DNA-binding replication protein A (RPA), large (70 kD) subunit and related ssDNA-binding proteins	COG	COG1599	53.1	1e-06	Replication, recombination and repair
7	KvenUN11909_1_702_plus	1.488	Membrane protease subunits, stomatin/prohibitin homologs	COG	COG0330	144	9e-35	Posttranslational modification, protein turnover, chaperones
8	KvenUN10715_75_896_plus	1.398	Adenylate kinase and related kinases	COG	COG0563	165	8e-41	Nucleotide transport and metabolism
9	KvenUN01390_89_409_plus	1.361	Putative sterol carrier protein	COG	COG3255	54.7	4e-08	Lipid transport and metabolism
10	KvenUN09975_68_736_plus	1.896	ATP sulfurylase (sulfate adenylyltransferase)	COG	COG2046	107	1e-23	Inorganic ion transport and metabolism
11	KvenUN04186_1_882_plus	2.731	ATP sulfurylase (sulfate adenylyltransferase)	COG	COG2046	89	1e-17	Inorganic ion transport and metabolism
12	KvenUN09021_1_1300_plus	1.269	Sulfite reductase, alpha subunit (flavoprotein)	COG	COG0369	278	1e-74	Inorganic ion transport and metabolism
13	KvenUN15511_1_822_minus	1.83	Predicted amidohydrolase	COG	COG0388	231	8e-61	General function prediction only
14	KvenUN18924_240_803_minus	1.883	Uncharacterized protein related to glutamine synthetase	COG	COG3968	99.8	3e-21	General function prediction only
15	KvenUN08444_96_1392_plus	1.268	Glycerol-3-phosphate dehydrogenase	COG	COG0240	295	9e-80	Energy production and conversion
16	KvenUN11577_113_1063_minus	1.565	Isocitrate lyase	COG	COG2224	198	1e-50	Energy production and conversion
17	KvenUN07692_1_818_plus	1.289	Malate/lactate dehydrogenases	COG	COG0039	117	2e-26	Energy production and conversion
18	KvenUN16000_1_760_plus	1.354	Isocitrate lyase	COG	COG2224	197	1e-50	Energy production and conversion
19	KvenUN00527_1_1586_plus	1.907	L-lactate dehydrogenase (FMN-dependent) and related alpha-hydroxy acid dehydrogenases	COG	COG1304	372	7e-103	Energy production and conversion
20	KvenUN26520_1_858_plus	1.448	Succinyl-CoA synthetase, beta subunit	COG	COG0045	174	2e-43	Energy production and conversion
21	KvenUN07611_1_928_minus	1.452	Citrate synthase	COG	COG0372	174	1e-43	Energy production and conversion
22	KvenUN04348_349_910_minus	1.294	Citrate synthase	COG	COG0372	244	6e-65	Energy production and conversion
23	KvenUN00155_1_1348_plus	1.671	Isocitrate lyase	COG	COG2224	352	1e-96	Energy production and conversion
24	KvenUN07702_1_910_plus	1.455	Succinate dehydrogenase/fumarate reductase, flavoprotein subunit	COG	COG1053	197	3e-50	Energy production and conversion
25	KvenUN11031_1_1576_plus	1.63	Succinate dehydrogenase/fumarate reductase, flavoprotein subunit	COG	COG1053	376	6e-104	Energy production and conversion
26	KvenUN08047_1_963_minus	1.509	Inorganic pyrophosphatase	COG	COG0221	103	3e-22	Energy production and conversion
27	KvenUN01669_56_1145_plus	1.277	Succinyl-CoA synthetase, alpha subunit	COG	COG0074	369	5e-102	Energy production and conversion
28	KvenUN15896_1_1424_plus	2.283	Inorganic pyrophosphatase	COG	COG3808	305	9e-83	Energy production and conversion
29	KvenUN05371_1_1019_plus	1.364	Phosphoglycerate dehydrogenase and related dehydrogenases	COG	COG0111	122	1e-27	Coenzyme transport and metabolism ; Amino acid transport and metabolism
30	KvenUN10560_1_404_plus	1.338	Fructose/tagatose bisphosphate aldolase	COG	COG0191	181	4e-46	Carbohydrate transport and metabolism
31	KvenUN01445_1_1518_plus	1.255	Glyceraldehyde-3-phosphate dehydrogenase/erythrose-4-phosphate dehydrogenase	COG	COG0057	389	7e-108	Carbohydrate transport and metabolism
32	KvenUN07546_1_893_plus	1.374	Enolase	COG	COG0148	281	9e-76	Carbohydrate transport and metabolism
33	KvenUN01008_78_1384_plus	1.629	3-phosphoglycerate kinase	COG	COG0126	456	4e-128	Carbohydrate transport and metabolism
34	KvenUN01257_1_471_plus	1.378	Triosephosphate isomerase	COG	COG0149	133	2e-31	Carbohydrate transport and metabolism
35	KvenUN01502_103_1355_plus	1.542	Glyceraldehyde-3-phosphate dehydrogenase/erythrose-4-phosphate dehydrogenase	COG	COG0057	403	3e-112	Carbohydrate transport and metabolism
36	KvenUN01539_273_1013_minus	1.623	3-phosphoglycerate kinase	COG	COG0126	285	5e-77	Carbohydrate transport and metabolism
37	KvenUN08184_274_1667_minus	1.428	Fructose/tagatose bisphosphate aldolase	COG	COG0191	451	9e-127	Carbohydrate transport and metabolism
38	KvenUN09108_165_1546_minus	1.476	3-phosphoglycerate kinase	COG	COG0126	487	2e-137	Carbohydrate transport and metabolism
39	KvenUN21711_1_872_plus	1.823	Methionine synthase I (cobalamin-dependent), methyltransferase domain	COG	COG0646	339	3e-93	Amino acid transport and metabolism
40	KvenUN00250_1_1442_plus	1.426	Glycine/serine hydroxymethyltransferase	COG	COG0112	488	7e-138	Amino acid transport and metabolism
41	KvenUN00197_1_843_plus	1.317	5,10-methylenetetrahydrofolate reductase	COG	COG0685	144	2e-34	Amino acid transport and metabolism
42	KvenUN00781_1_654_plus	1.726	Homoserine dehydrogenase	COG	COG0460	135	7e-32	Amino acid transport and metabolism
43	KvenUN11410_1_1293_minus	1.37	Tryptophan synthase beta chain	COG	COG0133	375	8e-104	Amino acid transport and metabolism
44	KvenUN08805_324_1702_minus	1.77	Fucoxanthin-chlorophyll a-c binding protein, chloroplastic OS=Odontella sinensis GN=FCPA PE=2 SV=1	Uniprot_Swissprot	sp|Q42395|FCP_ODOSI	31.71	1e-09	-
45	KvenUN01711_1_800_plus	2.022	Fucoxanthin-chlorophyll a-c binding protein, chloroplastic OS=Isochrysis galbana GN=FCP PE=1 SV=1	Uniprot_Swissprot	sp|Q39709|FCP_ISOGA	48.08	3e-30	-
46	KvenUN08350_83_874_plus	1.336	Fucoxanthin-chlorophyll a-c binding protein, chloroplastic OS=Isochrysis galbana GN=FCP PE=1 SV=1	Uniprot_Swissprot	sp|Q39709|FCP_ISOGA	45.57	6e-29	-
47	KvenUN00241_1_825_plus	1.757	Fucoxanthin-chlorophyll a-c binding protein, chloroplastic OS=Isochrysis galbana GN=FCP PE=1 SV=1	Uniprot_Swissprot	sp|Q39709|FCP_ISOGA	37.28	2e-19	-
48	KvenUN10017_1_759_plus	1.579	Fucoxanthin-chlorophyll a-c binding protein, chloroplastic OS=Isochrysis galbana GN=FCP PE=1 SV=1	Uniprot_Swissprot	sp|Q39709|FCP_ISOGA	44.03	1e-26	-
49	KvenUN20500_1_772_plus	1.667	Fucoxanthin-chlorophyll a-c binding protein F, chloroplastic OS=Phaeodactylum tricornutum GN=FCPF PE=3 SV=1	Uniprot_Swissprot	sp|Q41094|FCPF_PHATR	33.33	5e-10	-
50	KvenUN09742_1_1575_plus	1.387	Fucoxanthin-chlorophyll a-c binding protein F, chloroplastic OS=Phaeodactylum tricornutum GN=FCPF PE=3 SV=1	Uniprot_Swissprot	sp|Q41094|FCPF_PHATR	30.89	2e-11	-
51	KvenUN26890_156_786_minus	2.221	Fucoxanthin-chlorophyll a-c binding protein E, chloroplastic OS=Phaeodactylum tricornutum GN=FCPE PE=2 SV=1	Uniprot_Swissprot	sp|Q41093|FCPE_PHATR	33.33	8e-10	-
52	KvenUN00681_1_1197_plus	1.774	Fucoxanthin-chlorophyll a-c binding protein E, chloroplastic OS=Phaeodactylum tricornutum GN=FCPE PE=2 SV=1	Uniprot_Swissprot	sp|Q41093|FCPE_PHATR	31.28	1e-09	-
53	KvenUN03568_107_1146_minus	1.244	Fucoxanthin-chlorophyll a-c binding protein D, chloroplastic OS=Phaeodactylum tricornutum GN=FCPD PE=3 SV=1	Uniprot_Swissprot	sp|Q08587|FCPD_PHATR	34.67	6e-07	-
54	KvenUN00126_1_1215_plus	1.795	Fucoxanthin-chlorophyll a-c binding protein A, chloroplastic OS=Phaeodactylum tricornutum GN=FCPA PE=2 SV=1	Uniprot_Swissprot	sp|Q08584|FCPA_PHATR	31.16	8e-11	-
55	KvenUN11262_1_1184_plus	2.087	Fucoxanthin-chlorophyll a-c binding protein A, chloroplastic OS=Phaeodactylum tricornutum GN=FCPA PE=2 SV=1	Uniprot_Swissprot	sp|Q08584|FCPA_PHATR	32.22	9e-11	-
56	KvenUN07418_1_1548_plus	1.472	Fucoxanthin-chlorophyll a-c binding protein A, chloroplastic OS=Phaeodactylum tricornutum GN=FCPA PE=2 SV=1	Uniprot_Swissprot	sp|Q08584|FCPA_PHATR	31.86	1e-11	-
57	KvenUN10753_1_555_plus	1.733	Fucoxanthin-chlorophyll a-c binding protein A, chloroplastic OS=Phaeodactylum tricornutum GN=FCPA PE=2 SV=1	Uniprot_Swissprot	sp|Q08584|FCPA_PHATR	34.67	1e-10	-
58	KvenUN07588_276_1799_minus	1.943	Fucoxanthin-chlorophyll a-c binding protein A, chloroplastic OS=Phaeodactylum tricornutum GN=FCPA PE=2 SV=1	Uniprot_Swissprot	sp|Q08584|FCPA_PHATR	36.36	5e-13	-
59	KvenUN00401_1_1246_plus	1.364	Fucoxanthin-chlorophyll a-c binding protein A, chloroplastic OS=Phaeodactylum tricornutum GN=FCPA PE=2 SV=1	Uniprot_Swissprot	sp|Q08584|FCPA_PHATR	31.67	7e-11	-
60	KvenUN01244_1_1243_plus	1.653	Fucoxanthin-chlorophyll a-c binding protein A, chloroplastic OS=Phaeodactylum tricornutum GN=FCPA PE=2 SV=1	Uniprot_Swissprot	sp|Q08584|FCPA_PHATR	31.89	2e-10	-
61	KvenUN25415_1_1181_plus	1.672	Fucoxanthin-chlorophyll a-c binding protein A, chloroplastic OS=Phaeodactylum tricornutum GN=FCPA PE=2 SV=1	Uniprot_Swissprot	sp|Q08584|FCPA_PHATR	32.78	1e-12	-
62	KvenUN00992_1_1600_plus	1.675	Fucoxanthin-chlorophyll a-c binding protein A, chloroplastic OS=Phaeodactylum tricornutum GN=FCPA PE=2 SV=1	Uniprot_Swissprot	sp|Q08584|FCPA_PHATR	30.58	9e-12	-
63	KvenUN10767_1_932_plus	1.618	Chlorophyll a-b binding protein L1818, chloroplastic OS=Chlamydomonas moewusii GN=L1818 PE=2 SV=1	Uniprot_Swissprot	sp|Q03965|L181_CHLMO	41.36	1e-22	-
64	KvenUN20572_82_897_plus	1.625	Chlorophyll a-b binding protein L1818, chloroplastic OS=Chlamydomonas moewusii GN=L1818 PE=2 SV=1	Uniprot_Swissprot	sp|Q03965|L181_CHLMO	40.12	4e-21	-
65	KvenUN08262_71_1197_plus	1.383	A3E4E2_KARMI Chlorophyll a-b binding protein OS=Karlodinium micrum PE=2 SV=1	Uniprot_Tremble	A3E4E2	100	1e-129
66	KvenUN00337_80_1071_plus	1.797	Caroteno-chlorophyll a-c-binding protein (Fragment) OS=Amphidinium carterae PE=1 SV=1	Uniprot_Swissprot	sp|P55738|CCAC_AMPCA	47.92	9e-07	-
67	KvenUN09780_1_953_plus	1.681	Caroteno-chlorophyll a-c-binding protein (Fragment) OS=Amphidinium carterae PE=1 SV=1	Uniprot_Swissprot	sp|P55738|CCAC_AMPCA	46.15	1e-06	-
68	KvenUN00410_250_1073_minus	1.754	Caroteno-chlorophyll a-c-binding protein (Fragment) OS=Amphidinium carterae PE=1 SV=1	Uniprot_Swissprot	sp|P55738|CCAC_AMPCA	42.86	6e-08	-
69	KvenUN15135_1_394_minus	1.411	Q2IA28_KARMI Chloroplast light harvesting protein isoform 12 OS=Karlodinium micrum PE=2 SV=1	Uniprot_Tremble	Q2IA28	76.61	1e-39	-
70	KvenUN20433_1_951_plus	1.456	Q2IA29_KARMI Chloroplast light harvesting protein isoform 11 (Fragment) OS=Karlodinium micrum PE=2 SV=1	Uniprot_Tremble	Q2IA29	52.9	6e-23	-
71	KvenUN25290_1_734_plus	1.495	Q2JHB2_SYNJB Photosystem II protein, PsbB/PsbC family OS=Synechococcus sp. (strain JA-2-3B'a(2-13)) GN=CYB_2266 PE=3 SV=1	Uniprot_Tremble	Q2JHB2	56.67	6e-10	-
72	KvenUN08986_1_1223_plus	1.592	F2WQ64_KARMI Mitochondrial tricarboxylate transporter-like protein 1 OS=Karlodinium micrum PE=2 SV=1	Uniprot_Tremble	F2WQ64	55.36	4e-75	-
73	KvenUN08457_65_967_plus	1.952	F2WQ65_KARMI Mitochondrial tricarboxylate transporter-like protein 2 OS=Karlodinium micrum PE=2 SV=1	Uniprot_Tremble	F2WQ65	97.26	5e-161	-
74	KvenUN10056_100_776_plus	1.389	B7FBJ2_AREMA Strombine dehydrogenase OS=Arenicola marina GN=strdh PE=2 SV=1	Uniprot_Tremble	B7FBJ2	37.04	4e-17	-
75	KvenUN02071_1_587_plus	1.236	B9PL47_TOXGO LCCL domain-containing protein, putative OS=Toxoplasma gondii GN=TGGT1_011810 PE=4 SV=1	Uniprot_Tremble	B9PL47	48.72	3e-25	-
76	KvenUN00855_1_391_plus	1.335	A7YXY8_KARMI Putative uncharacterized protein OS=Karlodinium micrum PE=4 SV=1	Uniprot_Tremble	A7YXY8	86.87	1e-44	-
77	KvenUN02224_1_1045_plus	1.387	B9PH22_TOXGO 41-3 antigen, putative OS=Toxoplasma gondii GN=TGGT1_106700 PE=4 SV=1	Uniprot_Tremble	B9PH22	38.89	2e-07	-
78	KvenUN16460_1_440_plus	1.914	A7AQN1_BABBO Membrane protein, putative OS=Babesia bovis GN=BBOV_IV004890 PE=4 SV=1	Uniprot_Tremble	A7AQN1	40.62	4e-09	-
79	KvenUN09941_1_1240_plus	1.722	Probable mitochondrial transport protein fsf1 OS=Schizosaccharomyces pombe (strain 972 / ATCC 24843) GN=fsf1 PE=2 SV=2	Uniprot_Tremble	sp|O13793|FSF1_SCHPO	35.94	2e-34
80	KvenUN07989_1_836_plus	1.359	Probable calcium-binding protein CML20 OS=Arabidopsis thaliana GN=CML20 PE=2 SV=1	Uniprot_Tremble	sp|O82659|CML20_ARATH	45.76	4e-06
81	KvenUN09060_1_447_plus	2.439	B9PMH7_TOXGO Putative uncharacterized protein OS=Toxoplasma gondii GN=TGGT1_080860 PE=4 SV=1	Uniprot_Tremble	B9PMH7	47.42	6e-14	-
82	KvenUN08292_1_911_plus	1.38	F2U662_SALS5 Putative uncharacterized protein OS=Salpingoeca sp. (strain ATCC 50818) GN=PTSG_03639 PE=3 SV=1	Uniprot_Tremble	F2U662	46.69	1e-52	-
Table S3 Down-regulated proteins under -P condition compared to +P condition based on iTRAQ analysis.
Hits	cDNA library Accession	-P/+P Ratio	Description	Annatation source	Database Accession	Identity	E-Value	COG Functional-Categories
1	KvenUN03725_78_430_plus	0.685	Predicted Zn-ribbon RNA-binding protein	COG	COG2260	69.3	1e-12	Translation, ribosomal structure and biogenesis
2	KvenUN01623_135_1070_plus	0.662	Fibrillarin-like rRNA methylase	COG	COG1889	336	3e-92	Translation, ribosomal structure and biogenesis
3	KvenUN01856_90_953_plus	0.757	Fibrillarin-like rRNA methylase	COG	COG1889	337	1e-92	Translation, ribosomal structure and biogenesis
4	KvenUN16242_1_677_plus	0.529	Ribosomal protein L15E	COG	COG1632	264	9e-71	Translation, ribosomal structure and biogenesis
5	KvenUN03147_1_777_minus	0.764	Protein implicated in ribosomal biogenesis, Nop56p homolog	COG	COG1498	266	2e-71	Translation, ribosomal structure and biogenesis
6	KvenUN01707_84_414_plus	0.759	Small nuclear ribonucleoprotein (snRNP) homolog	COG	COG1958	85.5	2e-17	Transcription
7	KvenUN00808_1_659_plus	0.707	Cold shock proteins	COG	COG1278	71.2	1e-12	Transcription
8	KvenUN00861_1_904_plus	0.671	Ca2+-binding protein (EF-Hand superfamily)	COG	COG5126	224	1e-58	Signal transduction mechanisms ; Cytoskeleton ; Cell cycle control, cell division, chromosome partitioning ; General function prediction only
9	KvenUN00431_1_852_plus	0.767	Ca2+-binding protein (EF-Hand superfamily)	COG	COG5126	127	2e-29	Signal transduction mechanisms ; Cytoskeleton ; Cell cycle control, cell division, chromosome partitioning ; General function prediction only
10	KvenUN25155_1_370_plus	0.419	Protein-tyrosine-phosphatase	COG	COG0394	87.8	4e-18	Signal transduction mechanisms
11	KvenUN08369_1_827_plus	0.79	Single-stranded DNA-binding replication protein A (RPA), large (70 kD) subunit and related ssDNA-binding proteins	COG	COG1599	51.6	1e-06	Replication, recombination and repair
12	KvenUN03630_1_1281_plus	0.661	ATPase involved in DNA replication	COG	COG0470	91.7	2e-18	Replication, recombination and repair
13	KvenUN02140_1_1009_plus	0.754	Protease subunit of ATP-dependent Clp proteases	COG	COG0740	252	8e-67	Posttranslational modification, protein turnover, chaperones ; Intracellular trafficking, secretion, and vesicular transport
14	KvenUN09971_1_1438_plus	0.449	Cysteine protease	COG	COG4870	62.4	2e-09	Posttranslational modification, protein turnover, chaperones
15	KvenUN12499_74_862_plus	0.818	20S proteasome, alpha and beta subunits	COG	COG0638	224	8e-59	Posttranslational modification, protein turnover, chaperones
16	KvenUN19781_1_591_plus	0.598	Cysteine protease	COG	COG4870	52	6e-07	Posttranslational modification, protein turnover, chaperones
17	KvenUN11469_198_1727_minus	0.62	Cysteine protease	COG	COG4870	72.8	1e-12	Posttranslational modification, protein turnover, chaperones
18	KvenUN06508_163_1318_minus	0.649	Cysteine protease	COG	COG4870	79	1e-14	Posttranslational modification, protein turnover, chaperones
19	KvenUN02259_1_938_plus	0.707	20S proteasome, alpha and beta subunits	COG	COG0638	249	5e-66	Posttranslational modification, protein turnover, chaperones
20	KvenUN07664_1_931_minus	0.726	ATPases of the AAA+ class	COG	COG0464	107	3e-23	Posttranslational modification, protein turnover, chaperones
21	KvenUN01292_1_1797_minus	0.697	Glycosylphosphatidylinositol transamidase (GPIT), subunit GPI8	COG	COG5206	125	2e-28	Posttranslational modification, protein turnover, chaperones
22	KvenUN03717_130_894_minus	0.579	Predicted protease	COG	COG4934	75.5	7e-14	Posttranslational modification, protein turnover, chaperones
23	KvenUN10296_1_912_minus	0.806	IMP dehydrogenase/GMP reductase	COG	COG0516	196	4e-50	Nucleotide transport and metabolism
24	KvenUN01483_1_1058_plus	0.521	Phosphoribosylcarboxyaminoimidazole (NCAIR) mutase	COG	COG0041	68.9	1e-11	Nucleotide transport and metabolism
25	KvenUN01284_1_1211_plus	0.548	Phosphoribosylaminoimidazolesuccinocarboxamide (SAICAR) synthase	COG	COG0152	515	7e-146	Nucleotide transport and metabolism
26	KvenUN23689_1_912_plus	0.714	Phosphoribosylaminoimidazolesuccinocarboxamide (SAICAR) synthase	COG	COG0152	373	2e-103	Nucleotide transport and metabolism
27	KvenUN01370_1_1691_minus	0.63	Phosphoribosylaminoimidazolesuccinocarboxamide (SAICAR) synthase	COG	COG0152	184	3e-46	Nucleotide transport and metabolism
28	KvenUN20942_1_1069_plus	0.508	FOG: TPR repeat	COG	COG0457	191	1e-48	General function prediction only
29	KvenUN10149_34_998_minus	0.689	Predicted HD phosphohydrolase	COG	COG4341	152	8e-37	General function prediction only
30	KvenUN06490_55_829_plus	0.769	Superfamily II helicase	COG	COG1204	86.3	5e-17	General function prediction only
31	KvenUN08613_1_693_plus	0.676	GTPase SAR1 and related small G proteins	COG	COG1100	187	2e-47	General function prediction only
32	KvenUN08312_1_1254_plus	0.727	Aldo/keto reductases, related to diketogulonate reductase	COG	COG0656	159	6e-39	General function prediction only
33	KvenUN00907_1_1274_plus	0.654	Predicted dehydrogenases and related proteins	COG	COG0673	202	7e-52	General function prediction only
34	KvenUN11265_84_858_plus	0.743	Putative GTPases (G3E family)	COG	COG0523	169	4e-42	General function prediction only
35	KvenUN03571_1_920_plus	0.781	Uncharacterized conserved protein	COG	COG2013	145	1e-34	Function unknown
36	KvenUN05188_1_912_plus	0.716	Uncharacterized low-complexity proteins	COG	COG1357	81.3	2e-15	Function unknown
37	KvenUN11011_1_885_plus	0.777	Monomeric isocitrate dehydrogenase	COG	COG2838	272	5e-73	Energy production and conversion
38	KvenUN07566_1_1695_minus	0.709	F0F1-type ATP synthase, beta subunit	COG	COG0055	721	0	Energy production and conversion
39	KvenUN19774_1_606_plus	0.723	Electron transfer flavoprotein, beta subunit	COG	COG2086	261	4e-70	Energy production and conversion
40	KvenUN00980_78_884_plus	0.779	NAD-dependent aldehyde dehydrogenases	COG	COG1012	209	3e-54	Energy production and conversion
41	KvenUN08517_329_1155_minus	0.725	Electron transfer flavoprotein, beta subunit	COG	COG2086	300	2e-81	Energy production and conversion
42	KvenUN00395_1_1447_minus	0.661	GDP-D-mannose dehydratase	COG	COG1089	472	6e-133	Cell wall/membrane/envelope biogenesis
43	KvenUN05830_1_1245_minus	0.649	Sugar kinases, ribokinase family	COG	COG0524	252	8e-67	Carbohydrate transport and metabolism
44	KvenUN01466_1_1135_plus	0.623	Aspartate/tyrosine/aromatic aminotransferase	COG	COG0436	82.8	1e-15	Amino acid transport and metabolism
45	KvenUN17973_1_791_plus	0.507	Carboxypeptidase C (cathepsin A)	COG	COG2939	102	1e-21	Amino acid transport and metabolism
46	KvenUN05835_1_1223_plus	0.657	Poly [ADP-ribose] polymerase 2-B OS=Oryza sativa subsp. japonica GN=PARP2-B PE=3 SV=2	Uniprot_Swissprot	sp|Q0JMY1|PRP2B_ORYSJ	32.47	5e-06	-
47	KvenUN07515_75_855_plus	0.629	Tripeptidyl-peptidase 1 OS=Mus musculus GN=Tpp1 PE=1 SV=2	Uniprot_Swissprot	sp|O89023|TPP1_MOUSE	35.22	6e-24	-
48	KvenUN24371_1_853_plus	0.765	Thylakoid lumenal 15.0 kDa protein 2, chloroplastic OS=Arabidopsis thaliana GN=At5g52970 PE=1 SV=2	Uniprot_Swissprot	sp|Q9LVV5|TL15B_ARATH	44.83	2e-32	-
49	KvenUN00620_1_1340_minus	0.666	Sterol 3-beta-glucosyltransferase OS=Cryptococcus neoformans var. neoformans serotype D (strain JEC21 / ATCC MYA-565) GN=ATG26 PE=3 SV=1	Uniprot_Swissprot	sp|P0CN90|ATG26_CRYNJ	24.03	7e-06	-
50	KvenUN17974_1_565_minus	0.623	Serine carboxypeptidase-like 21 OS=Arabidopsis thaliana GN=SCPL21 PE=2 SV=2	Uniprot_Swissprot	sp|Q9LSV8|SCP21_ARATH	26.67	1e-07	-
51	KvenUN01650_1_433_plus	0.727	RAC family serine/threonine-protein kinase homolog OS=Dictyostelium discoideum GN=pkbA PE=1 SV=1	Uniprot_Swissprot	sp|P54644|KRAC_DICDI	37.5	4e-09	-
52	KvenUN23549_1_789_plus	0.346	Digestive cysteine proteinase 3 OS=Homarus americanus GN=LCP3 PE=2 SV=1	Uniprot_Swissprot	sp|P25784|CYSP3_HOMAM	81.25	7e-09	-
53	KvenUN09765_1_1186_plus	0.53	Cathepsin Z OS=Mus musculus GN=Ctsz PE=2 SV=1	Uniprot_Swissprot	sp|Q9WUU7|CATZ_MOUSE	41.32	1e-44	-
54	KvenUN11782_110_1205_minus	0.714	Cathepsin L1 OS=Homo sapiens GN=CTSL1 PE=1 SV=2	Uniprot_Swissprot	sp|P07711|CATL1_HUMAN	43.21	2e-08	-
55	KvenUN05156_1_1209_plus	0.724	Alpha-galactosidase OS=Coffea arabica PE=1 SV=1	Uniprot_Swissprot	sp|Q42656|AGAL_COFAR	38.84	2e-60	-
56	KvenUN06509_67_1279_plus	0.765	Q2JQB3_SYNJA Putative RNA-binding protein OS=Synechococcus sp. (strain JA-3-3Ab) GN=CYA_2821 PE=4 SV=1	Uniprot_Tremble	Q2JQB3	37.18	1e-07	-
57	KvenUN02727_81_476_plus	0.749	A7YXU5_KARMI RNA-binding protein OS=Karlodinium micrum PE=2 SV=1	Uniprot_Tremble	A7YXU5	41.13	6e-09	-
58	KvenUN00229_1_813_plus	0.747	B1R5N3_CLOPF Cold shock protein OS=Clostridium perfringens B str. ATCC 3626 GN=AC1_1645 PE=3 SV=1	Uniprot_Tremble	B1R5N3	46.27	8e-06	-
59	KvenUN13493_71_550_minus	0.634	C5KTL6_PERM5 HSP90 co-chaperone, putative OS=Perkinsus marinus (strain ATCC 50983 / TXsc) GN=Pmar_PMAR016595 PE=4 SV=1	Uniprot_Tremble	C5KTL6	47.41	2e-21	-
60	KvenUN26746_1_577_plus	0.202	E8V6J7_TERSS Deoxyribonuclease II (Precursor) OS=Terriglobus saanensis (strain ATCC BAA-1853 / DSM 23119 / SP1PR4) GN=AciPR4_1932 PE=4 SV=1	Uniprot_Tremble	E8V6J7	43.95	4e-24	-
61	KvenUN24477_1_879_plus	0.743	GILT-domain-containing protein [Coccomyxa subellipsoidea C-169]	NCBInr	gi|384253970|gb|EIE27444.1|	31.09	7e-06	-
62	KvenUN07083_1_583_minus	0.733	conserved unknown protein [Ectocarpus siliculosus]	NCBInr	gi|298713553|emb|CBJ27081.1|	49.12	6e-07	-
63	KvenUN15226_1_760_plus	0.649	G4YWI8_PHYSP Putative uncharacterized protein OS=Phytophthora sojae (strain P6497) GN=PHYSODRAFT_285146 PE=4 SV=1	Uniprot_Tremble	G4YWI8	38.46	2e-07	-
64	KvenUN09525_1_542_plus	0.716	G2Q1N6_THIHA Putative uncharacterized protein OS=Thielavia heterothallica (strain ATCC 42464 / BCRC 31852 / DSM 1799) GN=MYCTH_2298375 PE=4 SV=1	Uniprot_Tremble	G2Q1N6	33.83	1e-11	-
65	KvenUN13589_74_709_plus	0.637	F2UAE4_SALS5 Putative uncharacterized protein OS=Salpingoeca sp. (strain ATCC 50818) GN=PTSG_12315 PE=4 SV=1	Uniprot_Tremble	F2UAE4	47.37	2e-12	-
66	KvenUN17473_80_988_plus	0.797	F0YM06_AURAN Putative uncharacterized protein OS=Aureococcus anophagefferens GN=AURANDRAFT_67670 PE=4 SV=1	Uniprot_Tremble	F0YM06	70.18	1e-86	-
67	KvenUN01217_1_1130_plus	0.785	F0YM05_AURAN Putative uncharacterized protein OS=Aureococcus anophagefferens GN=AURANDRAFT_67669 PE=4 SV=1	Uniprot_Tremble	F0YM05	69.41	4e-86	-
68	KvenUN01846_1_1725_plus	0.725	F0XY80_AURAN Putative uncharacterized protein OS=Aureococcus anophagefferens GN=AURANDRAFT_61393 PE=4 SV=1	Uniprot_Tremble	F0XY80	38.37	7e-68	-
69	KvenUN09755_1_948_plus	0.714	C5LZB5_PERM5 Putative uncharacterized protein OS=Perkinsus marinus (strain ATCC 50983 / TXsc) GN=Pmar_PMAR025533 PE=4 SV=1	Uniprot_Tremble	C5LZB5	36.89	3e-07	-
70	KvenUN10278_111_872_minus	0.728	C5LMG1_PERM5 Putative uncharacterized protein (Fragment) OS=Perkinsus marinus (strain ATCC 50983 / TXsc) GN=Pmar_PMAR005561 PE=4 SV=1	Uniprot_Tremble	C5LMG1	38.69	1e-13	-
71	KvenUN11349_1_908_plus	0.682	C5KRB2_PERM5 Putative uncharacterized protein OS=Perkinsus marinus (strain ATCC 50983 / TXsc) GN=Pmar_PMAR019542 PE=4 SV=1	Uniprot_Tremble	C5KRB2	31.16	5e-06	-
72	KvenUN02219_1_475_plus	0.783	B8BT23_THAPS Predicted protein (Fragment) OS=Thalassiosira pseudonana GN=THAPSDRAFT_30846 PE=4 SV=1	Uniprot_Tremble	B8BT23	57.14	2e-07	-
73	KvenUN06366_218_1142_minus	0.552	B7GC34_PHATC Predicted protein OS=Phaeodactylum tricornutum (strain CCAP 1055/1) GN=PHATRDRAFT_49857 PE=4 SV=1	Uniprot_Tremble	B7GC34	35.68	2e-24	-
74	KvenUN05105_1_804_minus	0.777	B7FT77_PHATC Predicted protein OS=Phaeodactylum tricornutum (strain CCAP 1055/1) GN=PHATRDRAFT_43716 PE=4 SV=1	Uniprot_Tremble	B7FT77	30.73	3e-10	-
75	KvenUN03544_1_1061_plus	0.549	B0XKD0_CULQU Putative uncharacterized protein OS=Culex quinquefasciatus GN=CpipJ_CPIJ019835 PE=4 SV=1	Uniprot_Tremble	B0XKD0	37.5	2e-06	-
76	KvenUN02279_1_1096_plus	0.543	A8I201_HETRO Putative uncharacterized protein (Fragment) OS=Heterocapsa rotundata PE=2 SV=1	Uniprot_Tremble	A8I201	57.35	1e-12	-
77	KvenUN00586_1_268_plus	0.626	A8I1R0_HETTR Putative uncharacterized protein OS=Heterocapsa triquetra PE=4 SV=1	Uniprot_Tremble	A8I1R0	90	7e-26	-
78	KvenUN06921_1_861_plus	0.625	A7WQ02_KARMI Putative uncharacterized protein OS=Karlodinium micrum PE=2 SV=1	Uniprot_Tremble	A7WQ02	77.78	5e-78	-
79	KvenUN13240_89_719_plus	0.559	A7WQ02_KARMI Putative uncharacterized protein OS=Karlodinium micrum PE=2 SV=1	Uniprot_Tremble	A7WQ02	42.27	1e-29	-
80	KvenUN01806_1_557_plus	0.679	A7WPY2_KARMI Putative uncharacterized protein OS=Karlodinium micrum PE=4 SV=1	Uniprot_Tremble	A7WPY2	84.29	7e-26	-
81	KvenUN08659_1_583_plus	0.805	A5K6M5_PLAVS Putative uncharacterized protein OS=Plasmodium vivax (strain Salvador I) GN=PVX_099215 PE=4 SV=1	Uniprot_Tremble	A5K6M5	52.1	4e-24	-
82	KvenUN00229_1_813_plus	0.682	A1D6K5_NEOFI Putative uncharacterized protein OS=Neosartorya fischeri (strain ATCC 1020 / DSM 3700 / FGSC A1164 / NRRL 181) GN=NFIA_065130 PE=4 SV=1	Uniprot_Tremble	A1D6K5	41.24	3e-11	-
83	KvenUN22147_1_403_minus		-	-	-	-	-	-
84	KvenUN11337_1_624_plus		-	-	-	-	-	-
85	KvenUN13971_1_624_plus		-	-	-	-	-	-
86	KvenUN09712_195_665_plus		-	-	-	-	-	-
87	KvenUN11222_297_833_plus		-	-	-	-	-	-
88	KvenUN01056_1_1321_plus		-	-	-	-	-	-
89	KvenUN27180_1_846_plus		-	-	-	-	-	-
90	KvenUN26208_7_651_minus		-	-	-	-	-	-
91	KvenUN12962_1_1208_plus		-	-	-	-	-	-
92	KvenUN05783_1_1044_plus		-	-	-	-	-	-
93	KvenUN15719_1_191_plus		-	-	-	-	-	-
94	KvenUN24482_1_474_plus		-	-	-	-	-	-
95	KvenUN10539_1_1173_plus		-	-	-	-	-	-
96	KvenUN26038_1_749_minus		-	-	-	-	-	-
97	KvenUN23647_1_815_minus		-	-	-	-	-	-
98	KvenUN13743_1_786_minus		-	-	-	-	-	-
99	KvenUN09018_1_1319_plus		-	-	-	-	-	-
100	KvenUN17106_1_665_plus		-	-	-	-	-	-
101	KvenUN25582_1_779_minus		-	-	-	-	-	-
102	KvenUN25865_37_708_minus		-	-	-	-	-	-
103	KvenUN13120_1_557_plus		-	-	-	-	-	-
104	KvenUN10197_141_500_plus		-	-	-	-	-	-
105	KvenUN07965_1_1591_plus		-	-	-	-	-	-
106	KvenUN18965_36_868_minus		-	-	-	-	-	-
107	KvenUN08792_1_613_plus		-	-	-	-	-	-
108	KvenUN27189_1_402_plus		-	-	-	-	-	-
109	KvenUN08287_88_912_plus		-	-	-	-	-	-
110	KvenUN19782_1_471_plus		-	-	-	-	-	-
111	KvenUN20485_139_839_plus		-	-	-	-	-	-
112	KvenUN06531_1_1274_plus		-	-	-	-	-	-
113	KvenUN19120_1_569_plus		-	-	-	-	-	-
114	KvenUN24722_1_291_plus		-	-	-	-	-	-
115	KvenUN21418_1_912_minus		-	-	-	-	-	-
116	KvenUN27380_1_699_plus		-	-	-	-	-	-
117	KvenUN21486_1_806_plus		-	-	-	-	-	-
118	KvenUN15715_89_823_plus		-	-	-	-	-	-
119	KvenUN25561_1_583_minus		-	-	-	-	-	-
120	KvenUN18156_1_842_plus		-	-	-	-	-	-
121	KvenUN02549_1_961_minus		-	-	-	-	-	-
122	KvenUN15298_1_791_plus		-	-	-	-	-	-
123	KvenUN09544_1_1244_plus		-	-	-	-	-	-
124	KvenUN27258_1_231_minus		-	-	-	-	-	-
125	KvenUN22146_78_841_plus		-	-	-	-	-	-
126	KvenUN01639_1_697_plus		-	-	-	-	-	-
127	KvenUN07512_61_1680_plus		-	-	-	-	-	-
128	KvenUN26073_1_724_minus		-	-	-	-	-	-
129	KvenUN17542_1_441_plus		-	-	-	-	-	-
130	KvenUN12640_1_1432_plus		-	-	-	-	-	-
131	KvenUN09607_1_598_plus		-	-	-	-	-	-
132	KvenUN08653_1_863_plus		-	-	-	-	-	-
133	KvenUN10837_90_995_plus		-	-	-	-	-	-
134	KvenUN21487_1_780_minus		-	-	-	-	-	-
135	KvenUN26072_1_786_plus		-	-	-	-	-	-
136	KvenUN00443_74_1065_plus		-	-	-	-	-	-
